# Supplementary material
Source: publisher figshare collection journal article supplement (https://tandf.figshare.com/ndownloader/files/14565359)

**Supporting information**

**SrFe12O19 as an efficient catalytic system for the synthesis of highly functionalized 2-naphthol Mannich basesunder solvent free condition**

1. 1-((2,3-dichlorophenyl)(piperidin-1-yl)methyl)naphthalen-2-ol (4h)

IR:


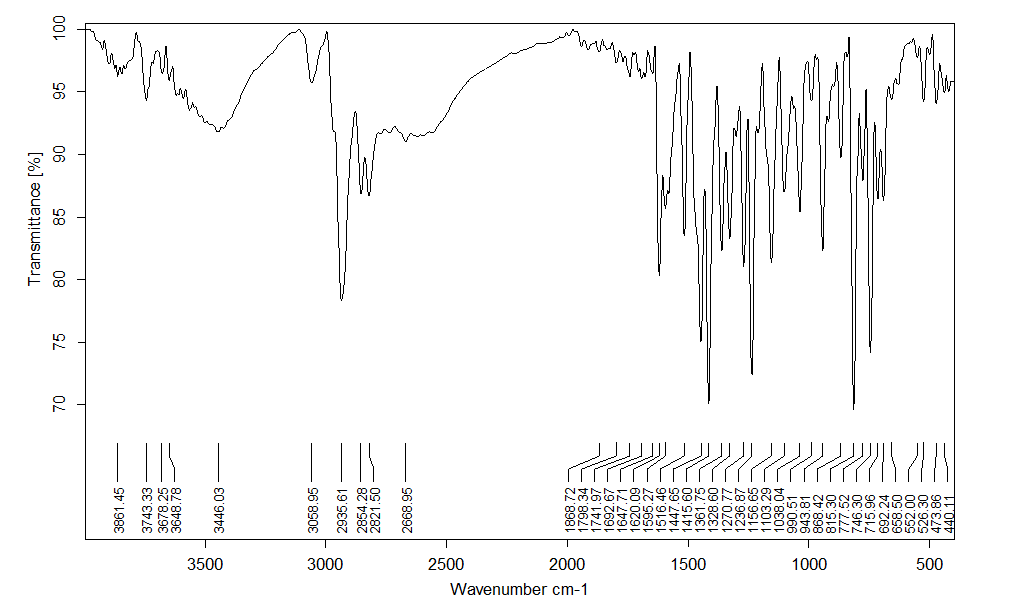


1HNMR:


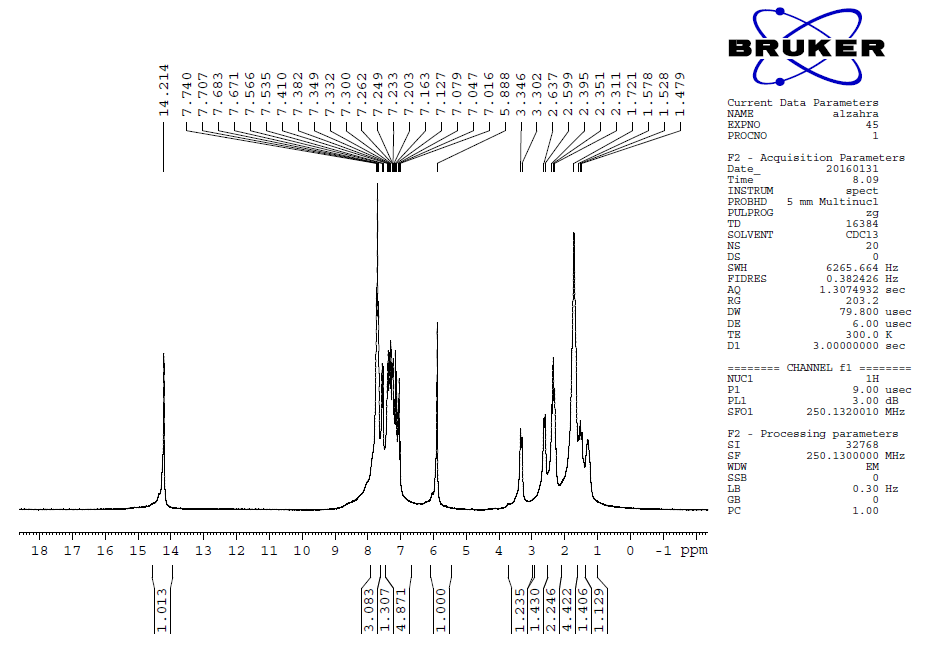


13CNMR:


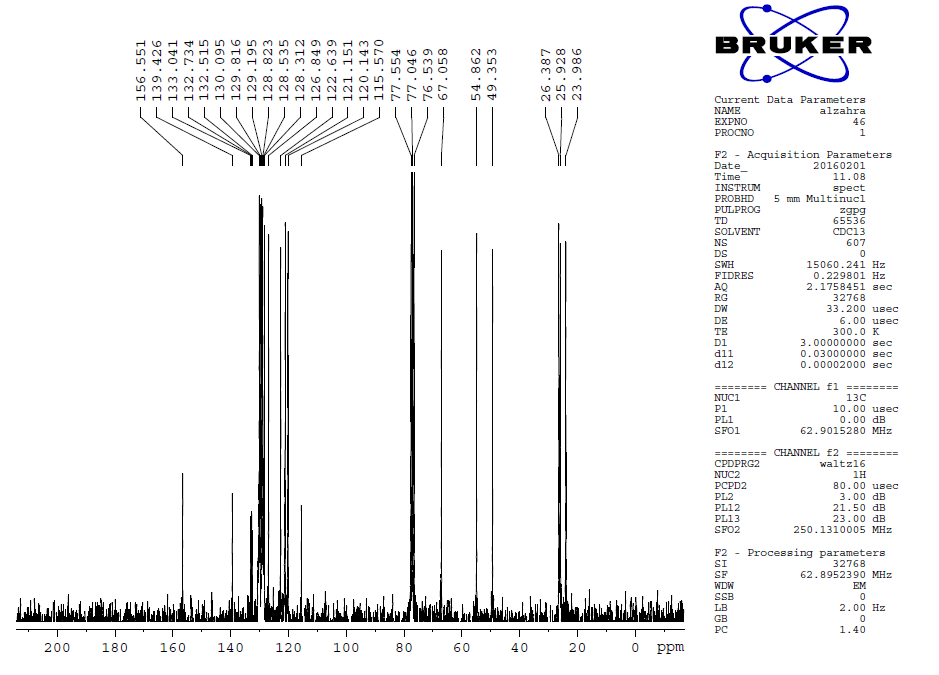


Mass:


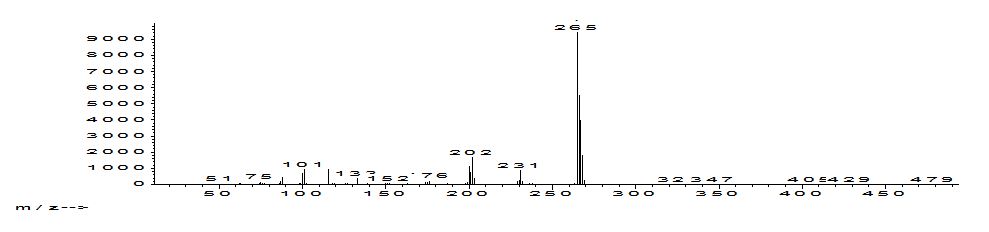


1. 1-((3-nitrophenyl)(piperidin-1-yl)methyl)naphthalen-2-ol (4i)

IR:


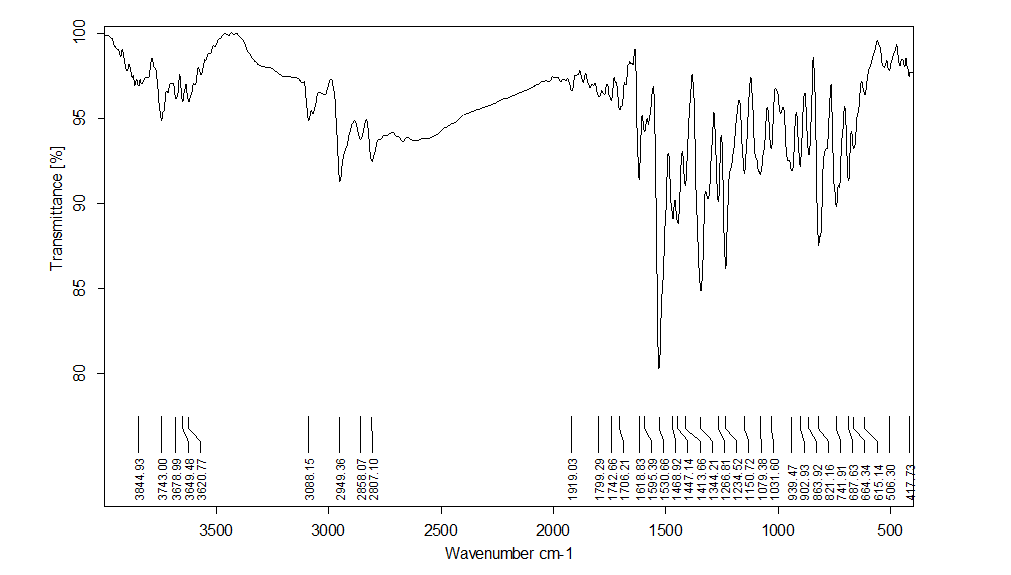


1HNMR:


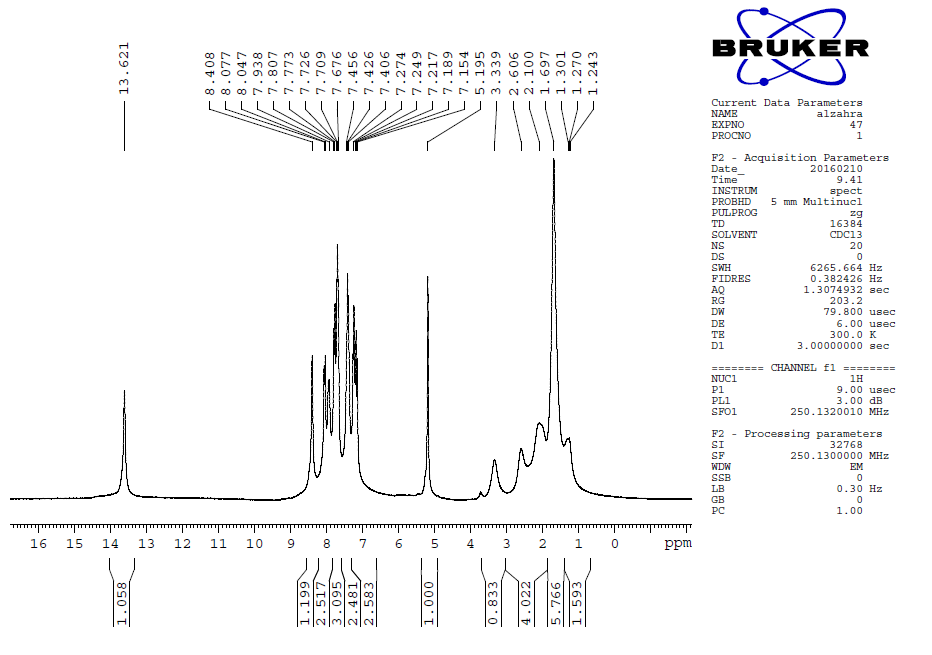


13CNMR:


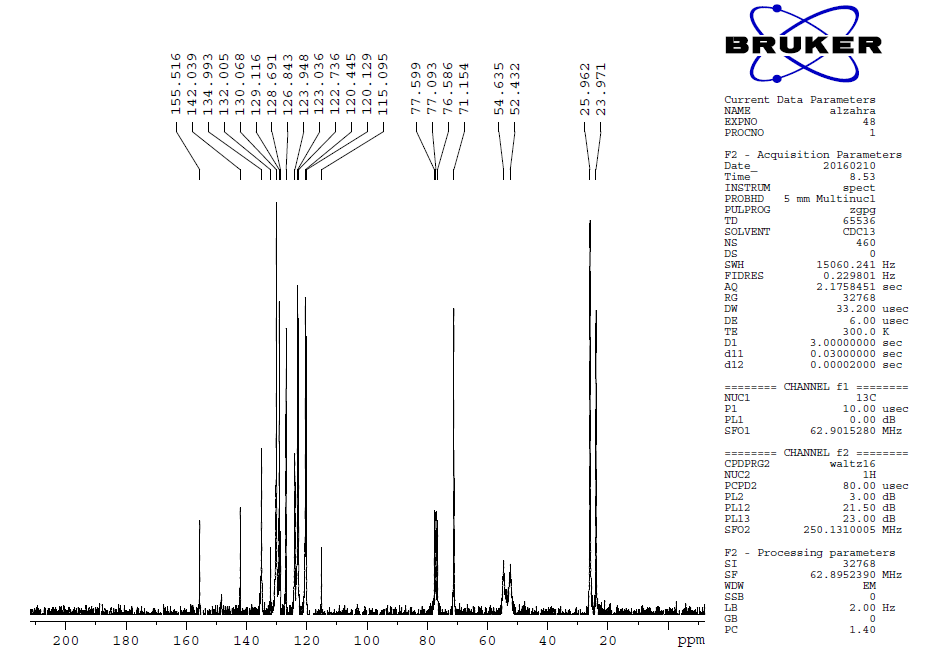


Mass:


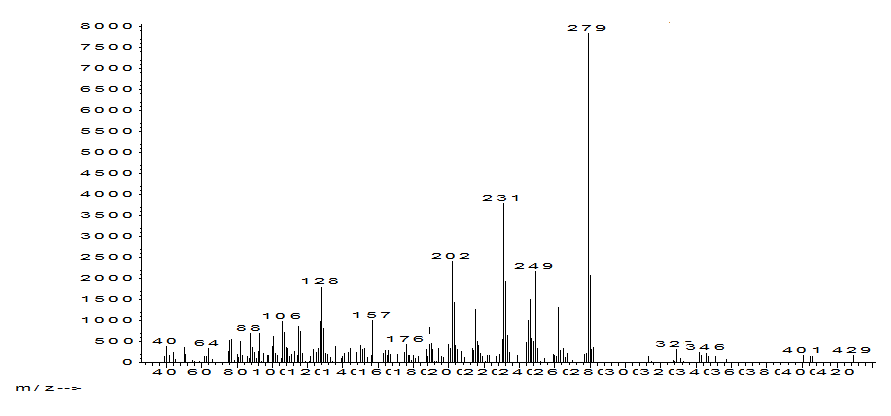

Supplement: Supplementary file 1 [file 14565359]
